# Supplementary material
Source: publisher figshare collection journal article supplement (https://asha.figshare.com/ndownloader/files/27561473)
Supplement: Supplementary file 1 [file 27561473]

## Supplemental Material S1. Detailed information regarding stimuli.

### Link to Project on Open Science Framework (Data and Scripts Available)

<https://osf.io/f5sbg/>

### Sentence Stimuli and Paired Distractor Objects

\*Italicized lines are filler trials

| Item | Sentence                                   | Cohort          | Unrelated       | Unrelated        |
|------|--------------------------------------------|-----------------|-----------------|------------------|
| 1a   | The friend plays the big piano.            | peanut          | trophy          | tractor          |
| 1b   | The friend has the big piano.              | peanut          | trophy          | tractor          |
| 1c   | <i>The friend has the big peanut.</i>      | <i>piano</i>    | <i>trophy</i>   | <i>tractor</i>   |
| 2a   | The child wins the big trophy.             | tractor         | piano           | peanut           |
| 2b   | The child sees the big trophy.             | tractor         | piano           | peanut           |
| 2c   | <i>The child sees the big tractor.</i>     | <i>trophy</i>   | <i>piano</i>    | <i>peanut</i>    |
| 3a   | The dad reads the green book.              | bush            | kite            | couch            |
| 3b   | The dad finds the green book.              | bush            | kite            | couch            |
| 3c   | <i>The dad finds the green bush.</i>       | <i>book</i>     | <i>kite</i>     | <i>couch</i>     |
| 4a   | The boy flies the green kite.              | couch           | book            | bush             |
| 4b   | The boy likes the green kite.              | couch           | book            | bush             |
| 4c   | <i>The boy likes the green couch.</i>      | <i>kite</i>     | <i>book</i>     | <i>bush</i>      |
| 5a   | The brother toasts the old bread.          | brush           | horn            | horse            |
| 5b   | The brother shares the old bread.          | brush           | horn            | horse            |
| 5c   | <i>The brother shares the old brush.</i>   | <i>bread</i>    | <i>horn</i>     | <i>horse</i>     |
| 6a   | The mother blows the old horn.             | horse           | bread           | brush            |
| 6b   | The mother sees the old horn.              | horse           | bread           | brush            |
| 6c   | <i>The mother sees the old horse.</i>      | <i>horn</i>     | <i>bread</i>    | <i>brush</i>     |
| 7a   | The woman eats the little sandwich.        | Santa           | football        | footprint        |
| 7b   | The woman finds the little sandwich.       | Santa           | football        | footprint        |
| 7c   | <i>The woman finds the little Santa.</i>   | <i>sandwich</i> | <i>football</i> | <i>footprint</i> |
| 8a   | The girl throws the little football.       | footprint       | sandwich        | Santa            |
| 8b   | The girl gets the little football.         | footprint       | sandwich        | Santa            |
| 8c   | <i>The girl gets the little footprint.</i> | <i>football</i> | <i>sandwich</i> | <i>Santa</i>     |
| 9a   | The brother draws the small picture.       | pickle          | cookies         | costume          |
| 9b   | The brother gets the small picture.        | pickle          | cookies         | costume          |
| 9c   | <i>The brother gets the small pickle.</i>  | <i>picture</i>  | <i>cookies</i>  | <i>costume</i>   |
| 10a  | The girl bakes the small cookies.          | costume         | picture         | pickle           |
| 10b  | The girl shares the small cookies.         | costume         | picture         | pickle           |
| 10c  | <i>The girl shares the small costume.</i>  | <i>cookies</i>  | <i>picture</i>  | <i>pickle</i>    |
| 11a  | The sister pours the good juice.           | jewel           | tree            | truck            |
| 11b  | The sister sees the good juice.            | jewel           | tree            | truck            |

|     |                                        |              |              |              |
|-----|----------------------------------------|--------------|--------------|--------------|
| 11c | <i>The sister sees the good jewel.</i> | <i>juice</i> | <i>tree</i>  | <i>truck</i> |
| 12a | The child climbs the good tree.        | truck        | juice        | jewel        |
| 12b | The child likes the good tree.         | truck        | juice        | jewel        |
| 12c | <i>The child likes the good truck.</i> | <i>tree</i>  | <i>juice</i> | <i>jewel</i> |
| 13a | The grandma pets the gray cat.         | can          | bike         | bag          |
| 13b | The grandma buys the gray cat.         | can          | bike         | bag          |
| 13c | <i>The grandma buys the gray can.</i>  | <i>cat</i>   | <i>bike</i>  | <i>bag</i>   |
| 14a | The friend rides the gray bike.        | bag          | cat          | can          |
| 14b | The friend drops the gray bike.        | bag          | cat          | can          |
| 14c | <i>The friend drops the gray bag.</i>  | <i>bike</i>  | <i>cat</i>   | <i>can</i>   |
| 15a | The grandpa drives the white car.      | cart         | dog          | doll         |
| 15b | The grandpa has the white car.         | cart         | dog          | doll         |
| 15c | <i>The grandpa has the white cart.</i> | <i>car</i>   | <i>dog</i>   | <i>doll</i>  |
| 16a | The man feeds the white dog.           | doll         | car          | cart         |
| 16b | The man buys the white dog.            | doll         | car          | cart         |
| 16c | <i>The man buys the white doll.</i>    | <i>dog</i>   | <i>car</i>   | <i>cart</i>  |
| 17a | The sister kicks the nice ball.        | box          | milk         | mail         |
| 17b | The sister finds the nice ball.        | box          | milk         | mail         |
| 17c | <i>The sister finds the nice box.</i>  | <i>ball</i>  | <i>milk</i>  | <i>mail</i>  |
| 18a | The boy drinks the nice milk.          | mail         | ball         | box          |
| 18b | The boy hides the nice milk.           | mail         | ball         | box          |
| 18c | <i>The boy hides the nice mail.</i>    | <i>milk</i>  | <i>ball</i>  | <i>box</i>   |

## Norming of Sentence Stimuli

The extent to which a semantically informative verb predicts the target noun was measured with a cloze task administered via an online survey to adults in Amazon Mechanical Turk. Each sentence stimulus (e.g., *The girl plays the big piano*) was made into a cloze task question by replacing the final noun with a blank for the participant to write in (e.g., *The girl plays the \_\_\_\_*). The adjective was also removed to prevent the semantics of the adjective from influencing the responder’s choice of noun. A minimum of 500 participants completed each sentence. First, 12 sentence stimuli were chosen based on proportion of responses for that item, with a proportion of .1 as the criteria (i.e., at least 10% of respondents filled in the blank with the target noun). An additional 5 sentences were selected as stimuli with proportions less than .1, which were decided to be sufficiently predictable given the nature of the verb and more frequent responses. For example, a large portion of the responses for “*wins the \_\_\_\_*” were *game*, *lottery*, and *prize*, but these words are not clearly imageable. The chosen target noun, *trophy*, which had a .03 proportion of responses, is easily imageable. One of the sentences, “*The brother toasts the old bread*,” was not normed because it was added after the completion of the cloze task experiment.

We also investigated whether the combination of adjective-target strings (e.g., *green book*) differed in frequency from adjective-cohort strings (*green bush*) using string frequency values from The Corpus of Contemporary American English (COCA) (Davies, 2008–). The adjective-cohort strings were more frequent than the adjective-target strings [ $t(33) = 2.40, p < .05$ ]. While this difference does not introduce bias into our investigation of the effect of condition, it is

possible that this significant difference could potentially lead to more cohort fixations in general. This would mean that in all conditions and groups we could be seeing more cohort fixations than we would see if the frequency of adjective-target and adjective-cohort strings were matched. When log frequency of adjective-cohort strings were added to an item-level analyses of cohort fixations, the significant effects of Condition remained for both the age-matched comparison [ $\beta = -.06$ ,  $SE = .02$ ,  $t(48) = -3.33$ ,  $p < .01$ ] and vocabulary-matched comparison [ $\beta = -.06$ ,  $SE = .02$ ,  $t(48) = -3.38$ ,  $p < .01$ ], and there were no significant effects or interactions with the string frequency measure [ $ps > .05$ ]. These results suggest that adjective-cohort string frequency does not have a significant effect on cohort fixations for children in this study. It is also possible that we may not have the power to detect such an effect in this sample size.

Davies, M. (2008–). *The Corpus of Contemporary American English (COCA): One billion words, 1990–2019*. <https://www.english-corpora.org/coca/>

### Norming of Visual Stimuli

All images were normed on 3- to 5-year-old children in four preschool classrooms at the University of Maryland Center for Young Children. Each child met with an experimenter individually and was shown a card containing four images in a recognition task. The child was asked to point to the picture of the word the experimenter said. Each picture was seen by at least 18 children and was recognized with at least 85% accuracy.

If the adjective in the sentence described the color of the target image (e.g., *the green kite*), the distractor objects shared the same attribute (*green book*, *green bush*, *green couch*). In the case of other preceding adjectives, such as *old* or *big*, the picture stimuli were designed so that none of the referents better represented the adjective compared to the others (e.g., none of the objects looked particularly old).

### R code for model of response accuracy

```
Accuracy ~ 1 + Condition * Group + (1 | Participant)
```

### Fixed effects for response accuracy in age-matched comparison

|                  | Estimate | SE    | z value | p value | Sig. |
|------------------|----------|-------|---------|---------|------|
| (Intercept)      | 4.4628   | .3979 | 11.2152 | .0000   | ***  |
| Condition        | 0.8637   | .4921 | 1.7553  | .0792   | +    |
| Group            | 0.7021   | .5478 | 1.2817  | .2000   |      |
| Condition: group | −0.2982  | .7991 | −0.3731 | .7091   |      |

+ $p < .10$ . \* $p < .05$ . \*\* $p < .01$ . \*\*\* $p < .001$ .

### Fixed effects for response accuracy in vocabulary-matched comparison

|                  | Estimate | SE    | z value | p value | Sig. |
|------------------|----------|-------|---------|---------|------|
| (Intercept)      | 4.5010   | .4025 | 11.1831 | .0000   | ***  |
| Condition        | 0.8645   | .4923 | 1.7561  | .0791   | +    |
| Group            | 0.2243   | .5266 | 0.4259  | .6702   |      |
| Condition: group | 0.3576   | .8251 | 0.4334  | .6647   |      |

+ $p < .10$ . \* $p < .05$ . \*\* $p < .01$ . \*\*\* $p < .001$ .

### R code for model of individual differences in children with CIs

```
Proportion of Target Fixations ~ 1 + Condition * PPVT-4
Standard Score + Age of Implantation + Age of Implantation:
Condition + Chronological Age + Chronological Age:
Condition + (1 | Participant)
```

### R code for models of target fixations

```
Proportion of Target Fixations ~ 1 + Condition * Group *
PPVT-4 GSV + (1 | Participant)
```

### R code for models of cohort fixations

```
Proportion of Cohort Fixations ~ 1 + Condition * Group *
PPVT-4 GSV + (1 | Participant)
```

### Fixed effects for target fixations in individual differences analysis

|                                                 | Estimate | SE     | df      | t value | p value | Sig. |
|-------------------------------------------------|----------|--------|---------|---------|---------|------|
| (Intercept)                                     | 0.3533   | 0.0203 | 27.3082 | 17.4390 | .0000   | ***  |
| Condition                                       | 0.1383   | 0.0162 | 20.0000 | 8.5561  | .0000   | ***  |
| Norm-referenced receptive vocabulary            | 0.0440   | 0.0208 | 27.3082 | 2.1118  | .0347   | *    |
| Chronological Age                               | -0.0046  | 0.0168 | 27.3082 | -0.2748 | .7835   |      |
| Age of implantation                             | 0.0103   | 0.0195 | 27.3082 | 0.5278  | .5977   |      |
| Condition: norm-referenced receptive vocabulary | 0.0125   | 0.0166 | 20.0000 | 0.7532  | .4514   |      |
| Condition: chronological age                    | 0.0191   | 0.0134 | 20.0000 | 1.4266  | .1537   |      |
| Condition: age of implantation                  | -0.0224  | 0.0156 | 20.0000 | -1.4387 | .1502   |      |

+ $p < .10$ . \* $p < .05$ . \*\* $p < .01$ . \*\*\* $p < .001$ .

**Fixed effects for target fixations in age-matched comparison**

|                                        | <b>Estimate</b> | <b>SE</b> | <b>df</b> | <b>t value</b> | <b>p value</b> | <b>Sig.</b> |
|----------------------------------------|-----------------|-----------|-----------|----------------|----------------|-------------|
| (Intercept)                            | 0.3372          | .0186     | 60.2209   | 18.1310        | .0000          | ***         |
| Condition                              | 0.1444          | .0149     | 44.0000   | 9.6963         | .0000          | ***         |
| Group                                  | 0.0728          | .0269     | 60.2209   | 2.7019         | .0069          | **          |
| Receptive vocabulary                   | 0.0240          | .0167     | 60.2209   | 1.4324         | .1520          |             |
| Condition: group                       | 0.0510          | .0216     | 44.0000   | 2.3640         | .0181          | *           |
| Condition: receptive vocabulary        | 0.0295          | .0134     | 44.0000   | 2.2000         | .0278          | *           |
| Group: receptive vocabulary            | −0.0222         | .0277     | 60.2209   | −0.8002        | .4236          |             |
| Condition: group: receptive vocabulary | −0.0519         | .0222     | 44.0000   | −2.3348        | .0196          | *           |

+ $p < .10$ . \* $p < .05$ . \*\* $p < .01$ . \*\*\* $p < .001$ .

**Fixed effects for cohort fixations in age-matched comparison**

|                                        | <b>Estimate</b> | <b>SE</b> | <b>df</b> | <b>t value</b> | <b>p value</b> | <b>Sig.</b> |
|----------------------------------------|-----------------|-----------|-----------|----------------|----------------|-------------|
| (Intercept)                            | 0.1374          | .0075     | 75.1368   | 18.3187        | .0000          | ***         |
| Condition                              | −0.0716         | .0081     | 44.0000   | −8.8205        | .0000          | ***         |
| Group                                  | −0.0158         | .0109     | 75.1368   | −1.4510        | .1468          |             |
| Receptive vocabulary                   | −0.0002         | .0068     | 75.1368   | −0.0328        | .9738          |             |
| Condition: group                       | −0.0162         | .0118     | 44.0000   | −1.3738        | .1695          |             |
| Condition: receptive vocabulary        | −0.0180         | .0073     | 44.0000   | −2.4646        | .0137          | *           |
| Group: receptive vocabulary            | −0.0120         | .0112     | 75.1368   | −1.0752        | .2823          |             |
| Condition: group: receptive vocabulary | 0.0219          | .0121     | 44.0000   | 1.8067         | .0708          | +           |

+ $p < .10$ . \* $p < .05$ . \*\* $p < .01$ . \*\*\* $p < .001$ .

**Fixed effects for target fixations in vocabulary-matched comparison**

|                                        | <b>Estimate</b> | <b>SE</b> | <b>df</b> | <b>t value</b> | <b>p value</b> | <b>Sig.</b> |
|----------------------------------------|-----------------|-----------|-----------|----------------|----------------|-------------|
| (Intercept)                            | 0.3263          | .0166     | 57.2170   | 19.6769        | .0000          | ***         |
| Condition                              | 0.1311          | .0121     | 44.0000   | 10.8256        | .0000          | ***         |
| Group                                  | 0.0344          | .0235     | 57.2170   | 1.4676         | .1422          |             |
| Receptive vocabulary                   | 0.0229          | .0158     | 57.2170   | 1.4535         | .1461          |             |
| Condition: group                       | 0.0357          | .0171     | 44.0000   | 2.0871         | .0369          | *           |
| Condition: receptive vocabulary        | 0.0282          | .0115     | 44.0000   | 2.4492         | .0143          | *           |
| Group: receptive vocabulary            | −0.0357         | .0237     | 57.2170   | −1.5084        | .1314          |             |
| Condition: group: receptive vocabulary | −0.0432         | .0173     | 44.0000   | −2.4996        | .0124          | *           |

+ $p < .10$ . \* $p < .05$ . \*\* $p < .01$ . \*\*\* $p < .001$ .

**Fixed effects for cohort fixations in vocabulary-matched comparison**

|                                        | <b>Estimate</b> | <b>SE</b> | <b>df</b> | <b>t value</b> | <b>p value</b> | <b>Sig.</b> |
|----------------------------------------|-----------------|-----------|-----------|----------------|----------------|-------------|
| (Intercept)                            | 0.1375          | .0072     | 75.8927   | 18.9804        | .0000          | ***         |
| Condition                              | −0.0635         | .0079     | 44.0000   | −7.9948        | .0000          | ***         |
| Group                                  | −0.0101         | .0102     | 75.8927   | −0.9874        | .3235          |             |
| Receptive vocabulary                   | −0.0002         | .0069     | 75.8927   | −0.0307        | .9755          |             |
| Condition: group                       | −0.0174         | .0112     | 44.0000   | −1.5491        | .1214          |             |
| Condition: receptive vocabulary        | −0.0173         | .0076     | 44.0000   | −2.2812        | .0225          | *           |
| Group: receptive vocabulary            | −0.0284         | .0104     | 75.8927   | −2.7347        | .0062          | **          |
| Condition: group: receptive vocabulary | 0.0430          | .0114     | 44.0000   | 3.7802         | .0002          | ***         |

+ $p < .10$ . \* $p < .05$ . \*\* $p < .01$ . \*\*\* $p < .001$ .

## Item-level models

An item analysis was carried out to determine whether inclusion of the log frequency of the target word explained any of the observed significant Condition or Group effects or Condition by Group interactions in the participant-level analysis. Each of the four models in the participant-level analyses were also run as an item-level model. Each dataset was constructed in the same manner as for the participant-level models, with the exception that eye gaze within the time window of interest was aggregated by item rather than by participant. This calculation averaged across trials and participants, so that each item had proportion calculations for each group (CI and NH) in each condition (Informative and Neutral). As in the participant-level analyses, both models of target and cohort fixations had the dependent variable of eye gaze regressed on the effect of Condition (coded as 0 for neutral and 1 for informative), the effect of Group (coded as 0 for CI and 1 for NH), and the interaction between Condition and Group. All item-level models included a random intercept for item. The log frequency of target word (centered and scaled) was also in the item-level models, including all interactions with Group and Condition.

## Age-matched comparison

### Target Fixations.

For item-level analysis of target fixations in the age-matched comparison, there was a significant main effect of Condition [ $\beta = .13$ ,  $SE = .02$ ,  $t(48) = 8.22$ ,  $p < .001$ ]. The proportion of looking to the target referent was significantly greater in the informative condition relative to the neutral. There was also a significant effect of Group [ $\beta = .08$ ,  $SE = .02$ ,  $t(48) = 5.29$ ,  $p < .001$ ], indicating that the group with NH were more accurate at looking to the target in the neutral condition in comparison to the group with CIs. The interaction between Condition and Group was significant [ $\beta = .05$ ,  $SE = .02$ ,  $t(48) = 2.39$ ,  $p < .05$ ]. The group with NH demonstrated more looking to the target in the informative condition relative to the neutral, and while children with CIs also showed this effect of condition they did so to a lesser extent. This item-level model reveals that the significant Condition and Group effects and Condition by Group interaction found in the participant-level model remain when accounting for item-level variability in target word frequency.

### Cohort Fixations.

The item-level analysis of cohort fixations in the age-matched comparison showed a significant effect of Condition [ $\beta = -.06$ ,  $SE = .01$ ,  $t(48) = -6.36$ ,  $p < .001$ ], meaning the cohort referent was looked at less in the informative condition relative to the neutral. There was also a significant effect of Group [ $\beta = -.02$ ,  $SE = .01$ ,  $t(48) = -2.11$ ,  $p < .05$ ], with the Group with NH demonstrating more looks to the target than the group with CIs in the neutral condition. This item-level model demonstrates that the significant effect of Condition shown in the participant-level model of cohort fixations is also significant when the item-level variable of target word frequency is included in the model. This item-level analysis also yielded a significant effect of Group that was not observed in the participant-level model. Since this effect is not significant in the participant-level analysis, it can be concluded that this item-level effect is not consistent or reliable across individuals within the groups. In addition, neither model for the age-matched comparison yielded significant effects or interactions with log frequency of target.

### ***Vocabulary-matched comparison***

#### **Target Fixations.**

For item-level analysis of target fixations in the vocabulary-matched comparison, there was a significant main effect of Condition [ $\beta = .13$ ,  $SE = .02$ ,  $t(48) = 7.99$ ,  $p < .001$ ]. Children showed more significantly more looking to the target referent in the informative condition relative to the neutral. There was also a significant effect of Group [ $\beta = .04$ ,  $SE = .02$ ,  $t(48) = 2.14$ ,  $p < .05$ ]. The group with NH demonstrated more target fixations than the group with CIs in the neutral condition. This item-level model shows that the significant effect of Condition shown in the participant-level model of cohort fixations is also significant when the item-level variable of target word frequency is included. However, this item-level analysis did not find a significant Condition by Group interaction [ $p > .05$ ], which was found to be significant in the participant-level model. This result suggests that this Condition by Group interaction in the participant-level model is not reliably found across all of the item sets in the experiment. For this reason, this interaction in the vocabulary-matched comparison should be interpreted with caution as we may not have the statistical power to generalize this result to spoken language beyond our experimental stimuli. This item-level analysis also found a significant effect of Group that was not seen in the participant-level model. This contradiction between participant-level and item-level models suggests that this item-level effect of Group is not reliable across individuals within the groups.

#### **Cohort Fixations.**

The item-level analysis of cohort fixations in the vocabulary-matched comparison yielded a significant effect of Condition [ $\beta = -.06$ ,  $SE = .01$ ,  $t(48) = -6.36$ ,  $p < .001$ ], showing that there were less cohort fixations in the informative condition relative to the neutral. This item-level model demonstrates that the significant effect of Condition seen in the participant-level model of cohort fixations is also significant when the item-level variable of target word frequency is included in the model. As in the age-matched comparison, neither model for the vocabulary-matched comparison resulted in any significant effects or interactions with log frequency of target.

#### **R code for item-level models of target fixations**

```
Proportion of Target Fixations ~ 1 + Condition * Group *  
Log Frequency of Target + (1 | Item Set)
```

#### **R code for item-level models of cohort fixations**

```
Proportion of Cohort Fixations ~ 1 + Condition * Group *  
Log Frequency of Target + (1 | Item Set)
```



**Fixed effects for item-level model of target fixations in age-matched comparison**

|                                           | <b>Estimate</b> | <b>SE</b> | <b>df</b> | <b>t value</b> | <b>p value</b> | <b>Sig.</b> |
|-------------------------------------------|-----------------|-----------|-----------|----------------|----------------|-------------|
| (Intercept)                               | 0.3256          | .0156     | 38.3508   | 20.9092        | .0000          | ***         |
| Condition                                 | 0.1315          | .0160     | 48.0000   | 8.2195         | .0000          | ***         |
| Group                                     | 0.0847          | .0160     | 48.0000   | 5.2937         | .0000          | ***         |
| Log frequency of target                   | 0.0097          | .0157     | 38.3508   | 0.6216         | .5342          |             |
| Condition: group                          | 0.0541          | .0226     | 48.0000   | 2.3927         | .0167          | *           |
| Condition: log frequency of target        | −0.0059         | .0161     | 48.0000   | −0.3691        | .7120          |             |
| Group: log frequency of target            | −0.0099         | .0161     | 48.0000   | −0.6142        | .5391          |             |
| Condition: group: log frequency of target | 0.0095          | .0228     | 48.0000   | 0.4148         | .6783          |             |

+ $p < .10$ . \* $p < .05$ . \*\* $p < .01$ . \*\*\* $p < .001$ .

**Fixed effects for item-level model of cohort fixations in age-matched comparison**

|                                           | <b>Estimate</b> | <b>SE</b> | <b>df</b> | <b>t value</b> | <b>p value</b> | <b>Sig.</b> |
|-------------------------------------------|-----------------|-----------|-----------|----------------|----------------|-------------|
| (Intercept)                               | 0.1380          | .0095     | 40.6613   | 14.4975        | .0000          | ***         |
| Condition                                 | −0.0642         | .0101     | 48.0000   | −6.3604        | .0000          | ***         |
| Group                                     | −0.0213         | .0101     | 48.0000   | −2.1097        | .0349          | *           |
| Log frequency of target                   | −0.0091         | .0096     | 40.6613   | −0.9449        | .3447          |             |
| Condition: group                          | −0.0224         | .0143     | 48.0000   | −1.5676        | .1170          |             |
| Condition: log frequency of target        | 0.0079          | .0102     | 48.0000   | 0.7788         | .4361          |             |
| Group: log frequency of target            | 0.0114          | .0102     | 48.0000   | 1.1252         | .2605          |             |
| Condition: group: log frequency of target | −0.0110         | .0144     | 48.0000   | −0.7661        | .4436          |             |

+ $p < .10$ . \* $p < .05$ . \*\* $p < .01$ . \*\*\* $p < .001$ .

**Fixed effects for item-level model of target fixations in vocabulary-matched comparison**

|                                           | <b>Estimate</b> | <b>SE</b> | <b>df</b> | <b>t value</b> | <b>p value</b> | <b>Sig.</b> |
|-------------------------------------------|-----------------|-----------|-----------|----------------|----------------|-------------|
| (Intercept)                               | 0.3256          | .0151     | 42.9675   | 21.5997        | .0000          | ***         |
| Condition                                 | 0.1315          | .0165     | 48.0000   | 7.9903         | .0000          | ***         |
| Group                                     | 0.0352          | .0165     | 48.0000   | 2.1376         | .0325          | *           |
| Log frequency of target                   | 0.0097          | .0152     | 42.9675   | 0.6422         | .5208          |             |
| Condition: group                          | 0.0346          | .0233     | 48.0000   | 1.4866         | .1371          |             |
| Condition: log frequency of target        | -0.0059         | .0166     | 48.0000   | -0.3588        | .7197          |             |
| Group: log frequency of target            | -0.0138         | .0166     | 48.0000   | -0.8338        | .4044          |             |
| Condition: group: log frequency of target | 0.0016          | .0234     | 48.0000   | 0.0679         | .9459          |             |

+ $p < .10$ . \* $p < .05$ . \*\* $p < .01$ . \*\*\* $p < .001$ .

**Fixed effects for item-level model of cohort fixations in vocabulary-matched comparison**

|                                           | <b>Estimate</b> | <b>SE</b> | <b>df</b> | <b>t value</b> | <b>p value</b> | <b>Sig.</b> |
|-------------------------------------------|-----------------|-----------|-----------|----------------|----------------|-------------|
| (Intercept)                               | 0.1380          | .0090     | 44.7122   | 15.2621        | .0000          | ***         |
| Condition                                 | -0.0642         | .0101     | 48.0000   | -6.3742        | .0000          | ***         |
| Group                                     | -0.0103         | .0101     | 48.0000   | -1.0195        | .3080          |             |
| Log frequency of target                   | -0.0091         | .0091     | 44.7122   | -0.9948        | .3198          |             |
| Condition: group                          | -0.0169         | .0142     | 48.0000   | -1.1837        | .2365          |             |
| Condition: log frequency of target        | 0.0079          | .0101     | 48.0000   | 0.7805         | .4351          |             |
| Group: log frequency of target            | 0.0030          | .0101     | 48.0000   | 0.3001         | .7641          |             |
| Condition: group: log frequency of target | 0.0025          | .0143     | 48.0000   | 0.1721         | .8634          |             |

+ $p < .10$ . \* $p < .05$ . \*\* $p < .01$ . \*\*\* $p < .001$ .
